# Supplementary material for: A Synbiotic Formulation Comprising Bacillus subtilis DSM 32315 and L-Alanyl-L-Glutamine Improves Intestinal Butyrate Levels and Lipid Metabolism in Healthy Humans
Source: MDPI journal article supplement (doi:10.3390/nu14010143), 2021-12-29
Supplement: s1 [file s1]

# A synbiotic formulation comprising *Bacillus subtilis* DSM 32315 and L-alanyl-L-glutamine improves intestinal butyrate levels and lipid metabolism in healthy humans

**Table S1.** Treatment affected the relative proportion of twenty species over time (Friedman rank sum test with subject as block factor, N = 54 with n = 18 subjects at n = 3 timepoints {baseline, two weeks and four weeks}). Taxa were ordered by decreasing median at baseline.

| Taxa                                                | Baseline |     |      | 2 weeks |     |      | 4 weeks |     |      | P-value | FDR corr<br>P-value |
|-----------------------------------------------------|----------|-----|------|---------|-----|------|---------|-----|------|---------|---------------------|
|                                                     | Median   | Min | Max  | Median  | Min | Max  | Median  | Min | Max  |         |                     |
| <i>Faecalibacterium prausnitzii</i>                 | 1118.5   | 0   | 1622 | 1476    | 59  | 2441 | 1264.5  | 17  | 2588 | 0.0421  | 0.6492              |
| <i>Ruminococcus unclassified</i>                    | 425.5    | 0   | 1975 | 228.5   | 0   | 1165 | 157     | 0   | 953  | 0.0469  | 0.6492              |
| <i>Roseburia unclassified</i>                       | 188      | 0   | 480  | 188     | 3   | 370  | 97.5    | 3   | 341  | 0.0308  | 0.6492              |
| <i>Lachnospiraceae</i> ND3007g<br>roup unclassified | 91.5     | 0   | 383  | 141.5   | 11  | 226  | 80.5    | 0   | 157  | 0.0021  | 0.2958              |
| <i>Lachnospiraceae</i> NK4A136<br>group bacterium   | 87.5     | 0   | 453  | 71      | 0   | 905  | 36      | 0   | 222  | 0.0521  | 0.6492              |
| <i>Lachnoclostridium edouardi</i>                   | 82       | 0   | 185  | 105     | 7   | 398  | 71      | 0   | 375  | 0.0214  | 0.6492              |
| <i>Monoglobus unclassified</i>                      | 66.5     | 0   | 325  | 69.5    | 1   | 355  | 69.5    | 1   | 263  | 0.0397  | 0.6492              |
| <i>Dorea unclassified</i>                           | 35       | 0   | 175  | 15      | 0   | 152  | 13      | 0   | 119  | 0.0634  | 0.6492              |
| <i>Roseburia intestinalis</i>                       | 30       | 0   | 1177 | 59.5    | 0   | 761  | 0       | 0   | 1503 | 0.0183  | 0.6492              |
| <i>IncertaeSedis unclassified</i>                   | 25.5     | 2   | 139  | 45      | 10  | 143  | 27.5    | 8   | 186  | 0.0124  | 0.6492              |
| <i>Ruminococcus bromii</i>                          | 17.5     | 0   | 898  | 4.5     | 0   | 1199 | 26      | 0   | 2795 | 0.0187  | 0.6492              |
| <i>Alistipes obesi</i>                              | 10.5     | 0   | 79   | 12      | 0   | 56   | 15      | 0   | 88   | 0.0498  | 0.6492              |
| <i>Klebsiella unclassified</i>                      | 3        | 0   | 503  | 0       | 0   | 1064 | 0       | 0   | 299  | 0.0373  | 0.6492              |
| <i>Bifidobacterium bifidum</i>                      | 1.5      | 0   | 141  | 0       | 0   | 179  | 1       | 0   | 214  | 0.0277  | 0.6492              |
| <i>Anaerofilum unclassified</i>                     | 0        | 0   | 12   | 0       | 0   | 10   | 0       | 0   | 10   | 0.0013  | 0.2958              |
| <i>Bacillus unclassified</i>                        | 0        | 0   | 1    | 0       | 0   | 3    | 0       | 0   | 53   | 0.0168  | 0.6492              |
| <i>Gordonibacter pamelaiae</i>                      | 0        | 0   | 0    | 0       | 0   | 3    | 0       | 0   | 8    | 0.0231  | 0.6492              |
| <i>Slackia isoflavoniconvertens</i>                 | 0        | 0   | 46   | 0       | 0   | 47   | 5       | 0   | 157  | 0.0354  | 0.6492              |
| <i>Bacteroides stercoris</i>                        | 0        | 0   | 62   | 0       | 0   | 173  | 0.5     | 0   | 91   | 0.0388  | 0.6492              |
| <i>Negativibacillus massiliensis</i>                | 0        | 0   | 27   | 0       | 0   | 44   | 0       | 0   | 0    | 0.0421  | 0.6492              |
| <i>Bacteroides coprocola</i>                        | 0        | 0   | 1206 | 0       | 0   | 2490 | 0       | 0   | 2669 | 0.0441  | 0.6492              |
| <i>Colidextribacter massiliensis</i>                | 0        | 0   | 10   | 0       | 0   | 15   | 3       | 0   | 18   | 0.0458  | 0.6492              |
